# Supplementary material
Source: PubMed Central journal article supplement (PMC1459401)

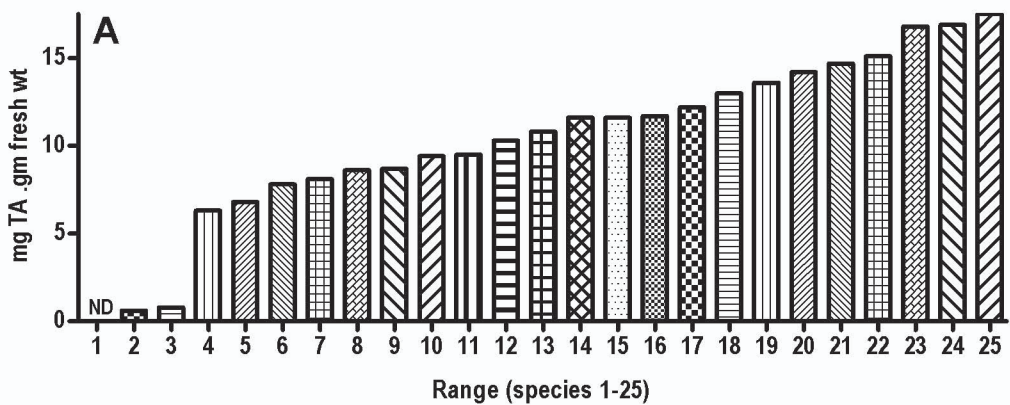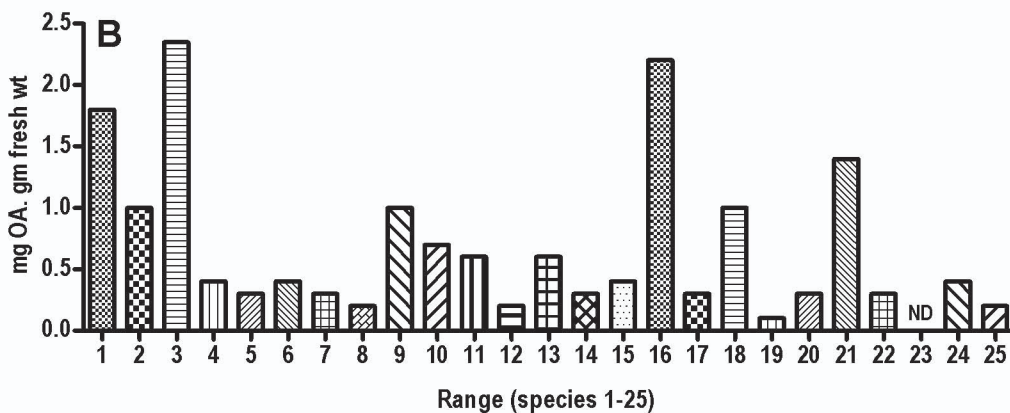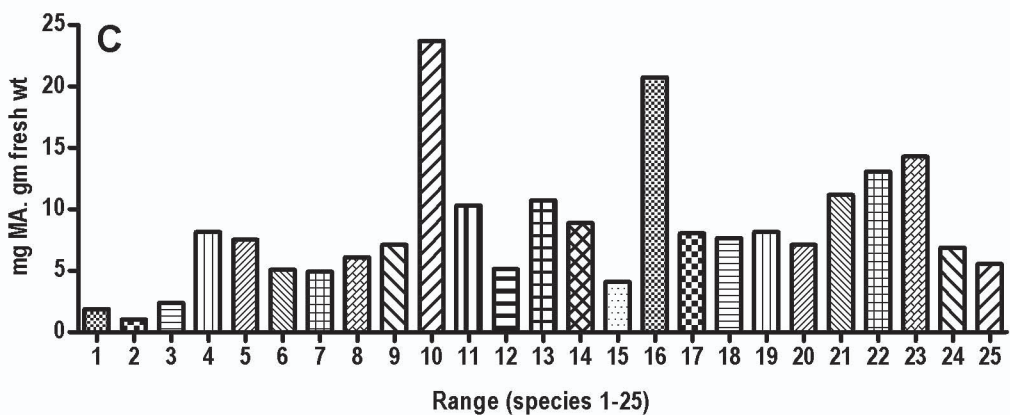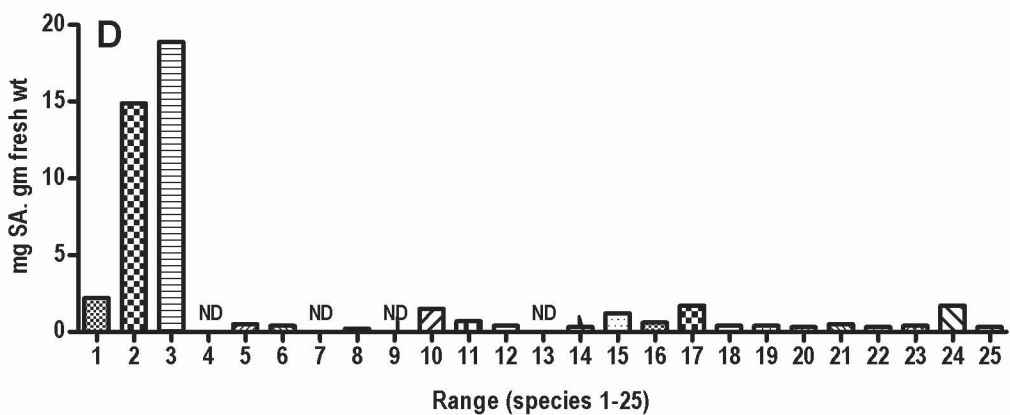

Supplement: pnas_0510864103_1.pdf [file pnas_0510864103_1.pdf]

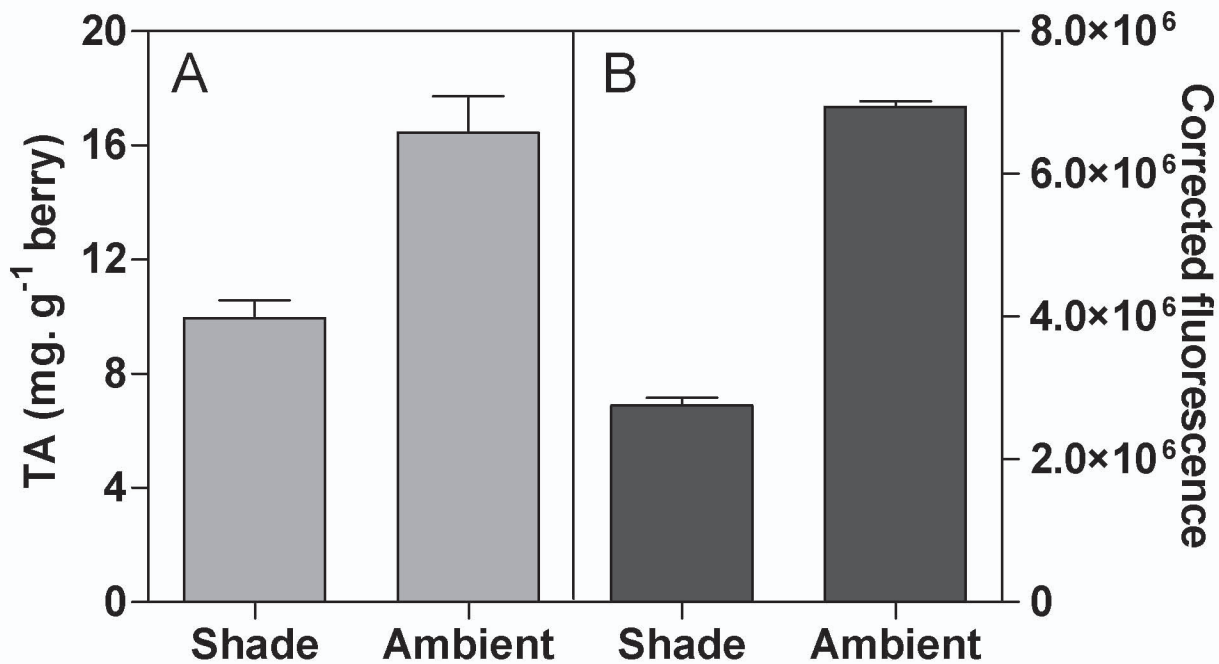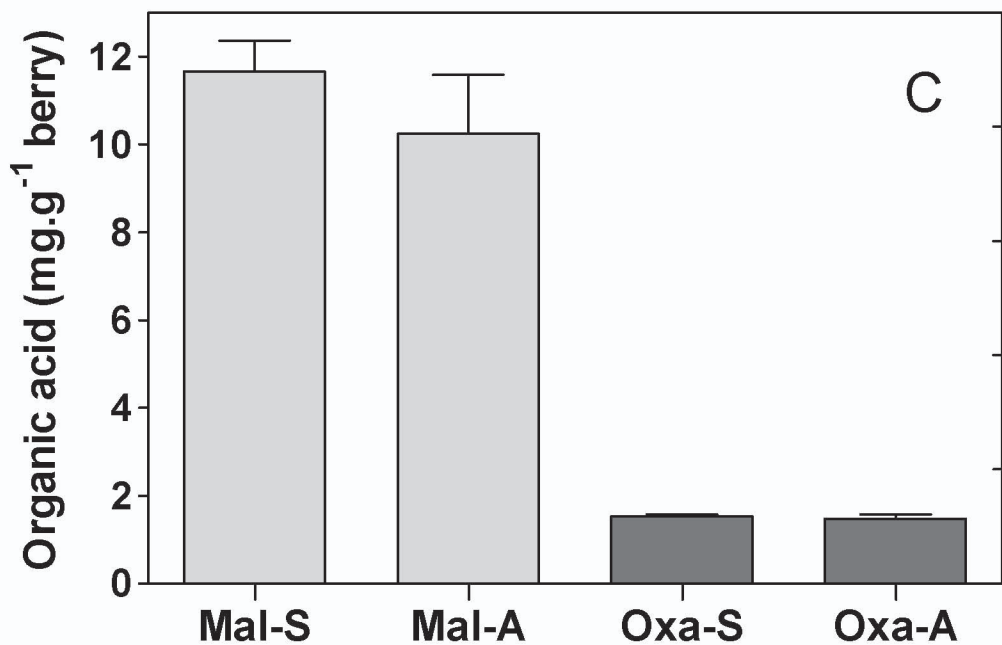

Supplement: pnas_0510864103_2.pdf [file pnas_0510864103_2.pdf]

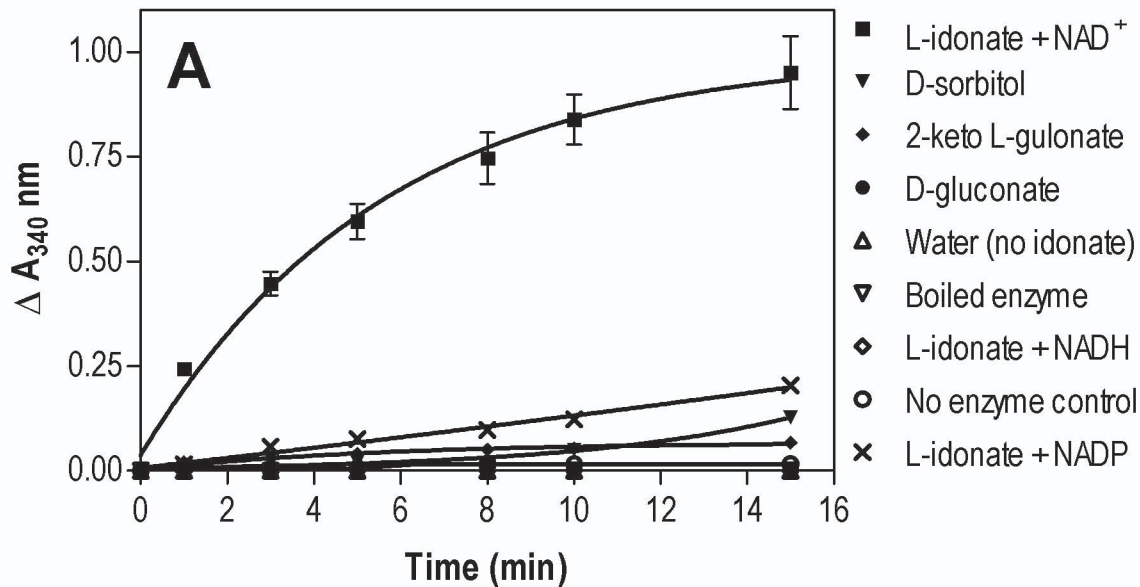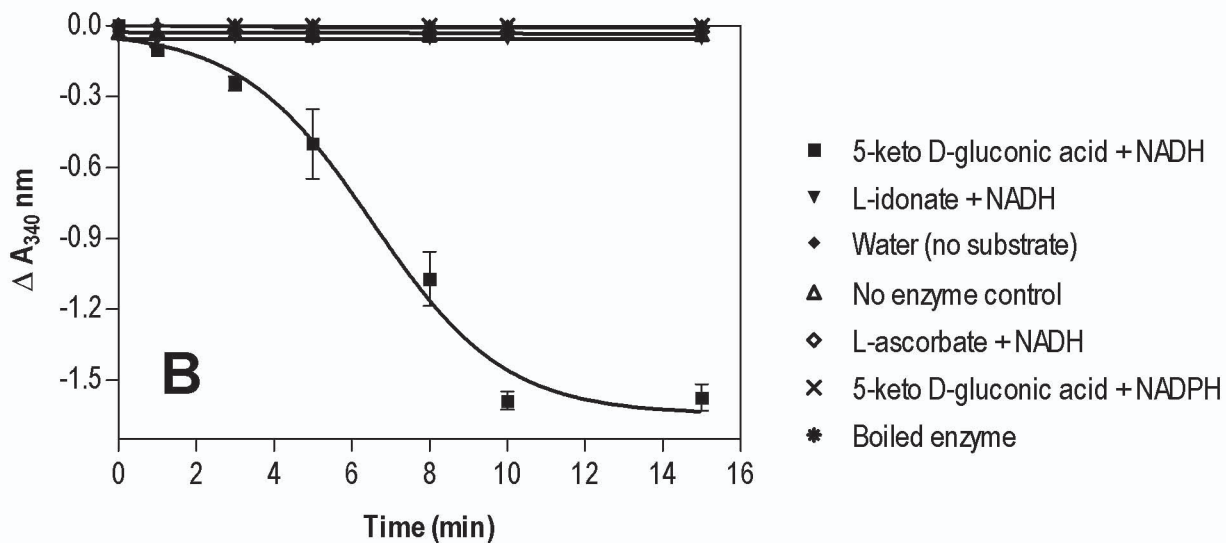

Supplement: pnas_0510864103_3.pdf [file pnas_0510864103_3.pdf]

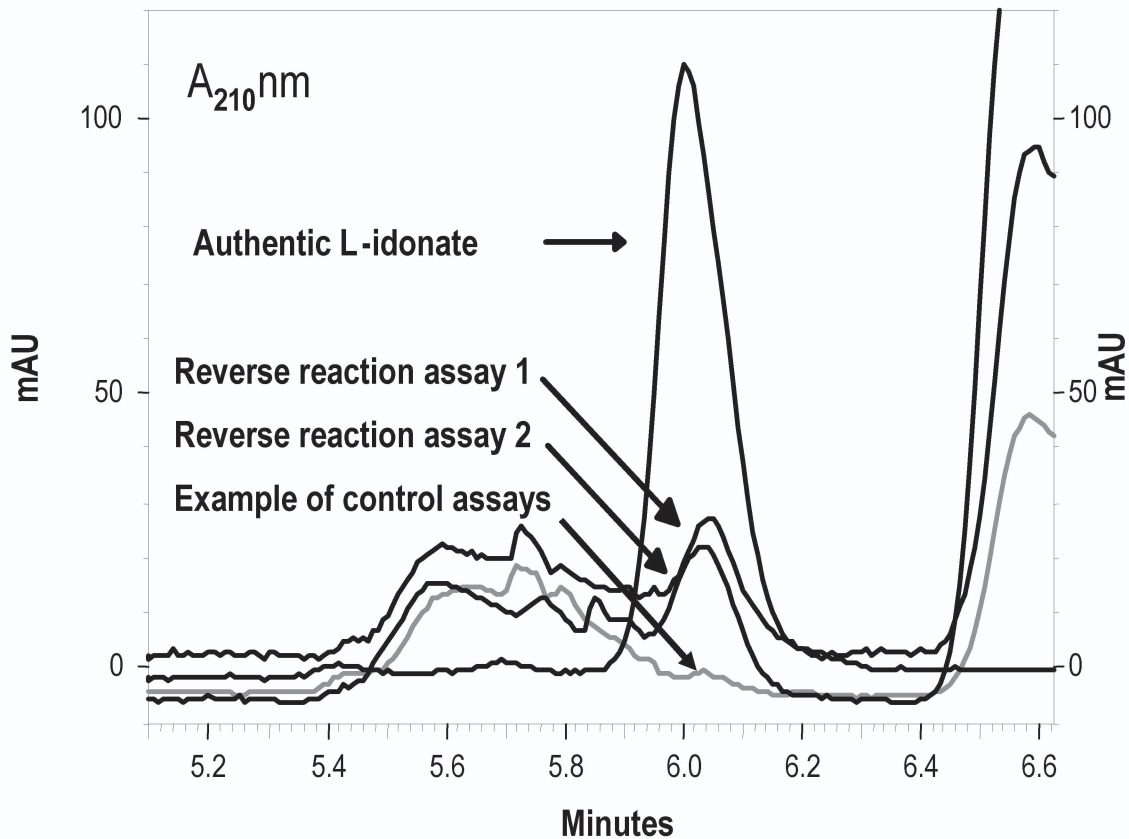

Supplement: pnas_0510864103_4.pdf [file pnas_0510864103_4.pdf]

A

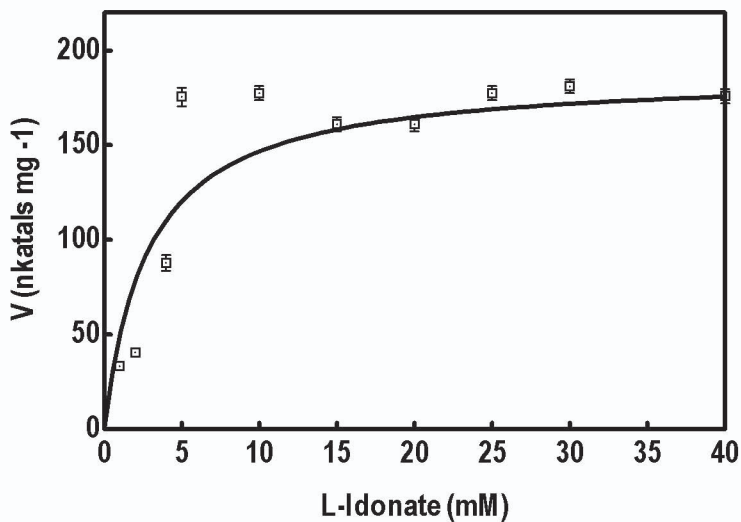

B

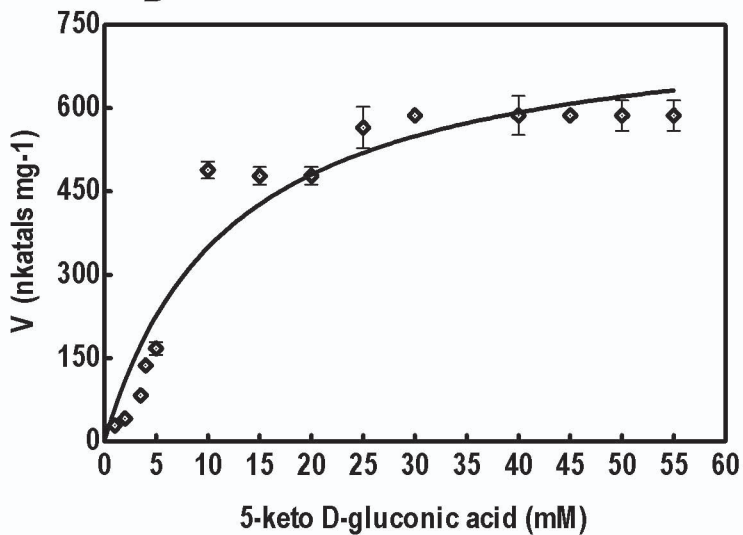

Supplement: pnas_0510864103_5.pdf [file pnas_0510864103_5.pdf]
